# Supplementary material for: Establishment of Tibetan-Sheep-Specific SNP Genetic Markers
Source: MDPI journal article supplement (doi:10.3390/agriculture13020322), 2023-01-28
Supplement: s1 [file s1]

Archive with 2 entries (2 files):
- Supplementary_figures.pdf
- Supplementary_tables.xlsx
