# Supplementary material for: Establishment of Tibetan-Sheep-Specific SNP Genetic Markers
Source: MDPI journal article supplement (doi:10.3390/agriculture13020322), 2023-01-28
Supplement: s1 [file s1 › Supplementary_tables.xlsx]

## Sheet: Table S1
Supplementary Table S1. Population distribution based on 600K high density SNP arrays.
Categories of the geographic locations	Abb	Population	Distribution	Sampling Size
Tibet	AW	Awang sheep (AW)	Gongjue County in Tibet	19
	DM	Duoma sheep(DM)	Anduo County in Tibet	19
	GB	Gangba sheep(GB)	Gangba County in Tibet	37
	HB	Huoerba sheep(HB)	Zhongba County in Tibet	19
	JZ	Jiangzi sheep(JZ)	Jiangzi County in Tibet	18
	LKZ	Langkazi sheep(LKZ)	Langkazi County in Tibet	19
	ZG	Zuogong sheep(ZG)	Zuogong County in Tibet	18
	ValTib	Shangu sheep(ValTib)	Gongga County in Tibet	10
	PraTib	Grassland sheep(PraTib)	Dangxiong County in Tibet	10
	GraTib	Grassland sheep(GraTib)	Gaize County in Tibet	23
Qinghai	HZ	Heizang sheep(HZ)	Guinan County in Qinghai	18
	SG	Shangu sheep(SG)	Maqin County in Qinghai	18
	QL	Qilian sheep(QL)	Qilian County in Qinghai	18
	QT	Qinghai Tibetan sheep(QT)	Zeku County in Qinghai	18
	QOL	Oula sheep (QOL)	Henan County in Qinghai	18
Gansu	GOL	Oula sheep(GOL)	Maqu County in Gansu	18
	GJ	Ganjia sheep(GJ)	Xiahe County in Gansu	18
	QK	Qiaoke sheep(QK)	Luqu County in Gansu	18
	TS	Tao sheep(TS)	Zhuoni County in Gansu	21
Sichuan	GG	Gongga sheep(GG)	Luding County in Sichuan	18
	JL	Jialuo sheep(JL)	Aba County in Sichuan	18
	ZX	Zhaxika sheep(ZX)	Shiqu County in Sichuan	19
Yunnan	JC	Jianchuan sheep(JC)	Jianchuan County in Yunnan	18
	NL	Ninglang sheep(NL)	Ninglang autonomous county in Yunnan	18
Total				448

## Sheet: Table S2
Supplementary Table S2. Information on 20 breed-specific SNP genetic markers used to distinguish Zuogong sheep
CHR	SNP	BP
2	2:71916887	71916887
17	17:44254231	44254231
1	1:145283709	145283709
1	1:21105542	21105542
10	10:77673707	77673707
6	6:94438144	94438144
1	1:28185415	28185415
22	22:10858044	10858044
1	1:31089174	31089174
7	7:81021287	81021287
24	24:30425151	30425151
10	10:12297769	12297769
10	10:40641754	40641754
6	6:89234423	89234423
16	16:63088296	63088296
5	5:84504578	84504578
6	6:4767941	4767941
16	16:57598185	57598185
4	4:5013794	5013794
10	10:77282832	77282832

## Sheet: Table S3
Supplementary Table S3. Information on 60 breed-specific SNP genetic markers used to distinguish Heizang sheep
CHR	SNP	BP
12	12:70868799	70868799
19	19:31625342	31625342
2	2:224227631	224227631
2	2:197849226	197849226
3	3:19846468	19846468
26	26:11932928	11932928
9	9:40017593	40017593
4	4:13430859	13430859
7	7:72093146	72093146
19	19:32408035	32408035
2	2:148163172	148163172
2	2:40132076	40132076
3	3:190556797	190556797
19	19:30894723	30894723
4	4:33060219	33060219
21	21:30268528	30268528
9	9:11605195	11605195
18	18:65664435	65664435
18	18:55083670	55083670
1	1:235598241	235598241
5	5:16012593	16012593
21	21:25263547	25263547
11	11:9293383	9293383
1	1:168713255	168713255
1	1:222468610	222468610
3	3:215040488	215040488
19	19:31738455	31738455
5	5:87881935	87881935
23	23:2909047	2909047
22	22:24935651	24935651
5	5:70306173	70306173
7	7:26153293	26153293
3	3:84440783	84440783
10	10:63357921	63357921
24	24:11896071	11896071
11	11:28188656	28188656
25	25:9590820	9590820
1	1:157904946	157904946
7	7:1665376	1665376
13	13:21379548	21379548
12	12:34647937	34647937
7	7:69134184	69134184
20	20:5027407	5027407
4	4:30095096	30095096
1	1:154736308	154736308
14	14:3143727	3143727
2	2:67221320	67221320
2	2:57751685	57751685
17	17:27292247	27292247
10	10:20757091	20757091
14	14:14312675	14312675
8	8:68126706	68126706
16	16:18046563	18046563
20	20:9397463	9397463
21	21:41470366	41470366
13	13:45238284	45238284
1	1:126603474	126603474
21	21:27241014	27241014
5	5:31238816	31238816
16	16:298171	298171

## Sheet: Table S4
Supplementary Table S4. Information on 60 breed-specific SNP genetic markers used to distinguish Gongga sheep
CHR	SNP	BP
20	20:43614539	43614539
1	1:197923073	197923073
26	26:15338450	15338450
19	19:42949839	42949839
12	12:76006303	76006303
2	2:178043880	178043880
3	3:204294276	204294276
10	10:28403932	28403932
10	10:82922079	82922079
13	13:410572	410572
6	6:62107457	62107457
9	9:83980015	83980015
4	4:68070782	68070782
6	6:23510366	23510366
1	1:212238833	212238833
1	1:176884649	176884649
3	3:129557524	129557524
3	3:135142188	135142188
6	6:52823887	52823887
25	25:6376237	6376237
9	9:75221801	75221801
9	9:74504029	74504029
3	3:98993005	98993005
19	19:29188805	29188805
3	3:75584665	75584665
21	21:47521671	47521671
3	3:131706799	131706799
16	16:8364519	8364519
17	17:34691051	34691051
16	16:45012412	45012412
26	26:19561138	19561138
3	3:42439977	42439977
2	2:7615930	7615930
6	6:4350317	4350317
7	7:13123840	13123840
14	14:9663127	9663127
2	2:177312073	177312073
14	14:42238529	42238529
6	6:106179760	106179760
19	19:16859465	16859465
5	5:69355636	69355636
5	5:38256176	38256176
17	17:44041683	44041683
26	26:1236441	1236441
3	3:68814267	68814267
14	14:41579417	41579417
2	2:187267193	187267193
6	6:96248551	96248551
23	23:55880544	55880544
25	25:4819931	4819931
3	3:129036201	129036201
2	2:129742045	129742045
22	22:14575167	14575167
15	15:20401111	20401111
2	2:47568329	47568329
16	16:26266976	26266976
16	16:17922414	17922414
26	26:6462828	6462828
26	26:3811687	3811687
2	2:14085104	14085104

## Sheet: Table S5
Supplementary Table S5.Information on 30 breed-specific SNP genetic markers used to distinguish Tao sheep
CHR	SNP	BP
3	3:117747453	117747453
10	10:72055695	72055695
24	24:21313840	21313840
20	20:31911724	31911724
15	15:4613183	4613183
1	1:101365237	101365237
13	13:32722648	32722648
26	26:33304262	33304262
13	13:46782612	46782612
16	16:35583379	35583379
9	9:94096764	94096764
5	5:16229568	16229568
25	25:35140908	35140908
3	3:141812983	141812983
4	4:115307793	115307793
9	9:24755520	24755520
5	5:2420577	2420577
1	1:69029802	69029802
4	4:61093231	61093231
1	1:138197108	138197108
25	25:3280273	3280273
7	7:68677725	68677725
14	14:57564507	57564507
15	15:76576792	76576792
21	21:5940187	5940187
1	1:234387987	234387987
13	13:72862631	72862631
6	6:55669060	55669060
13	13:10149127	10149127
7	7:2141294	2141294

## Sheet: Table S6
Supplementary Table S6. Information on 60 breed-specific SNP genetic markers used to distinguish Tibetan sheep in Yunnan
CHR	SNP	BP
19	19:49279447	49279447
17	17:56836957	56836957
5	5:55469930	55469930
1	1:121504989	121504989
4	4:5597910	5597910
13	13:62081618	62081618
11	11:20037115	20037115
13	13:69061144	69061144
4	4:113539466	113539466
7	7:10725609	10725609
4	4:56065814	56065814
1	1:177403893	177403893
14	14:45169942	45169942
26	26:35855319	35855319
26	26:31614508	31614508
15	15:57909806	57909806
1	1:177486631	177486631
4	4:111764101	111764101
2	2:34496939	34496939
4	4:86185154	86185154
4	4:85051323	85051323
3	3:41676078	41676078
6	6:68386874	68386874
13	13:41425851	41425851
8	8:15383421	15383421
7	7:84082455	84082455
16	16:70295417	70295417
6	6:21974335	21974335
22	22:29076695	29076695
10	10:30050162	30050162
22	22:41837782	41837782
26	26:22268060	22268060
19	19:54806289	54806289
25	25:42518328	42518328
3	3:204358893	204358893
3	3:186165574	186165574
16	16:34150678	34150678
18	18:58139042	58139042
16	16:30243884	30243884
14	14:3490985	3490985
7	7:43841106	43841106
2	2:143577771	143577771
4	4:32188511	32188511
20	20:24182142	24182142
2	2:247112229	247112229
16	16:33887158	33887158
5	5:86716610	86716610
19	19:13479400	13479400
15	15:74061518	74061518
3	3:176855094	176855094
14	14:43421054	43421054
3	3:44598024	44598024
3	3:93850194	93850194
1	1:238867065	238867065
5	5:9368000	9368000
7	7:31327963	31327963
7	7:47213097	47213097
9	9:77111547	77111547
18	18:4873230	4873230
1	1:90379200	90379200
